# Supplementary material
Source: ML conference proceedings conference paper supplement (https://openaccess.thecvf.com/content/cvpr_2016/html/Wang_Relaxation-Based_Preprocessing_Techniques_2016_CVPR_paper.html)
Supplement: Supplementary file 1 [file Wang_Relaxation-Based_Preprocessing_Techniques_2016_CVPR_supplemental.pdf]

# Relaxation-Based Preprocessing Techniques for Markov Random Field Inference –Supplementary Material

Chen Wang  
Cornell University  
chenwang@cs.cornell.edu

Ramin Zabih  
Cornell University  
rdz@cs.cornell.edu

## 1. Proof of Theorem 3

Recall several important definitions on minimum energy change for unary costs and pairwise costs given partial labeling  $x_S$  as following:

$$\begin{aligned}
 \delta_i(x_i) &:= \min_{y_i \neq x_i} \theta_i(y_i) - \theta_i(x_i) \\
 \delta_{ij}^i(x_i, x_j) &:= \min_{y_i \neq x_i} (\theta_{ij}(y_i, x_j) - \theta_{ij}(x_i, x_j)) \\
 \delta_{ij}^i(x_i, \cdot) &:= \min_{y_i \neq x_i, z_j \in \mathcal{L}_j} (\theta_{ij}(y_i, z_j) - \theta_{ij}(x_i, z_j)) \\
 \delta_{ij}^{ij}(x_i, x_j) &:= \min_{y_i \neq x_i, y_j \neq x_j} (\theta_{ij}(y_i, y_j) - \theta_{ij}(x_i, x_j))
 \end{aligned} \tag{1}$$

**Theorem 3.** *The partial labeling  $x_S$  is persistent if:*

$$\sum_{i \in A} \delta_i(x_i) + \sum_{ij \in (A, S \setminus A)} \delta_{ij}^i(x_i, x_j) + \sum_{ij \in (A, V \setminus S)} \delta_{ij}^i(x_i, \cdot) + \sum_{ij \in (A, A)} \delta_{ij}^{ij}(x_i, x_j) > 0, \quad \forall A \subseteq S, A \neq \emptyset. \tag{2}$$

*Proof.* For arbitrary  $x_{V \setminus S} \in \mathcal{L}_{V \setminus S}$  and  $y_S \in \mathcal{L}_S$  such that  $y_S \neq x_S$ , let  $A = \{i \in S \mid x_i \neq y_i\}$ . Since  $x_S \neq y_S$ , we must have  $A \neq \emptyset$ . Now we have:

$$\begin{aligned}
 & E(y_S \oplus x_{V \setminus S}) - E(x_S \oplus x_{V \setminus S}) \\
 &= \sum_{i \in A} (\theta_i(y_i) - \theta_i(x_i)) + \sum_{ij \in (A, S \setminus A)} (\theta_{ij}(y_i, x_j) - \theta_{ij}(x_i, x_j)) + \sum_{ij \in (A, V \setminus S)} (\theta_{ij}(y_i, x_j) - \theta_{ij}(x_i, x_j)) + \sum_{ij \in (A, A)} (\theta_{ij}(y_i, y_j) - \theta_{ij}(x_i, x_j)) \\
 &\geq \sum_{i \in A} \delta_i(x_i) + \sum_{ij \in (A, S \setminus A)} \delta_{ij}^i(x_i, x_j) + \sum_{ij \in (A, V \setminus S)} \delta_{ij}^i(x_i, \cdot) + \sum_{(i,j) \in (A, A)} \delta_{ij}^{ij}(x_i, x_j) \\
 &> 0,
 \end{aligned} \tag{3}$$

where the first equation above is by expanding the definition of energy function, and the second inequality is due to our definition of  $\phi_i, \delta_i^{ij}, \Psi^{ij}, \Delta_i^{ij}$ .  $\square$

## 2. Proof of Theorem 5

**Theorem 5** (*k*-condition for  $S$ ). *The ILM partial labeling  $x_S$  containing at least  $k$  variables is persistent if  $\forall B \subseteq S, |B| = k \geq 1$ , the following inequalities hold:*

$$\sum_{i \in C} \delta_i(x_i) + \sum_{ij \in (C, B \setminus C)} \delta_{ij}^i(x_i, x_j) + \sum_{ij \in (C, V \setminus S)} \delta_{ij}^i(x_i, \cdot) > 0, \quad \forall C \subseteq B, C \neq \emptyset \tag{4}$$

*Proof.* We will show for arbitrary non-empty set  $A \subseteq S$ , (2) will be satisfied, hence  $x_S$  is persistent by Theorem 3. There are two cases.

**Case 1:** Suppose  $0 < |A| \leq k$ , find any super set  $B \supseteq A$  such that  $|B| = k$ , we will have:

$$\begin{aligned}
& \sum_{i \in A} \delta_i(x_i) + \sum_{ij \in (A, S \setminus A)} \delta_{ij}^i(x_i, x_j) + \sum_{ij \in (A, V \setminus S)} \delta_{ij}^i(x_i, \cdot) + \sum_{ij \in (A, A)} \delta_{ij}^{ij}(x_i, x_j) \\
& \geq \sum_{i \in A} \delta_i(x_i) + \sum_{ij \in (A, S \setminus A)} \delta_{ij}^i(x_i, x_j) + \sum_{ij \in (A, V \setminus S)} \delta_{ij}^i(x_i, \cdot) \\
& \geq \sum_{i \in A} \delta_i(x_i) + \sum_{ij \in (A, B \setminus A)} \delta_{ij}^i(x_i, x_j) + \sum_{ij \in (A, V \setminus S)} \delta_{ij}^i(x_i, \cdot) \\
& > 0
\end{aligned} \tag{5}$$

where the first step is due to  $\delta_{ij}^{ij}(x_i, x_j) \geq 0$  for ILM labeling, the second step is due to  $(A, B \setminus A) \subseteq (A, S \setminus A)$  and  $\delta_{ij}^i(x_i, x_j) \geq 0$  and the last step is due to the  $k$ -condition for  $B$  and  $C := A \subseteq B$ .

**Case 2:** Suppose  $|A| > k$ , find all  $A$ 's subset with cardinality  $k$ , i.e.,  $\mathcal{B} = \{B \mid B \subseteq A, |B| = k\}$  and we have:

$$\begin{aligned}
& \sum_{i \in A} \delta_i(x_i) + \sum_{ij \in (A, S \setminus A)} \delta_{ij}^i(x_i, x_j) + \sum_{ij \in (A, V \setminus S)} \delta_{ij}^i(x_i, \cdot) + \sum_{ij \in (A, A)} \delta_{ij}^{ij}(x_i, x_j) \\
& \geq \sum_{i \in A} \delta_i(x_i) + \sum_{ij \in (A, V \setminus S)} \delta_{ij}^i(x_i, \cdot) \\
& = \frac{1}{\binom{|A|-1}{k-1}} \cdot \binom{|A|-1}{k-1} \left( \sum_{i \in A} \delta_i(x_i) + \sum_{ij \in (A, V \setminus S)} \delta_{ij}^i(x_i, \cdot) \right) \\
& = \frac{1}{\binom{|A|-1}{k-1}} \cdot \sum_{B \in \mathcal{B}} \left( \sum_{i \in B} \delta_i(x_i) + \sum_{ij \in (B, V \setminus S)} \delta_{ij}^i(x_i, \cdot) \right) \\
& > 0
\end{aligned} \tag{6}$$

where the first step, again, is due to  $\delta_{ij}^i(x_i, x_j) \geq 0$  and  $\delta_{ij}^{ij}(x_i, x_j) \geq 0$  for ILM labeling, the third equations is just a re-arrangement of terms in the double summation and the last step is due to the  $k$ -condition for  $B$  and  $C := B$ , note that  $\sum_{ij \in (B, B \setminus B)} \delta_{ij}^i(x_i, x_j)$  vanishes since  $(B, B \setminus B) = \emptyset$ .  $\square$

### 3. Proof of Lemma 6

**Lemma 6.** *The ILM partial labeling  $x_S$  is persistent if we can partition  $S$  into disjoint subsets  $S = \bigcup_t S_t$  and each  $S_t$  satisfies the corresponding  $|S_t|$ -condition.*

*Proof.* Again, we will show for arbitrary non-empty set  $A \subseteq S$ , (2) will be satisfied, hence  $x_S$  is persistent by Theorem 3.

Define  $A_t = A \cap S_t$ , it's easy to see  $A = \bigcup_t A_t$  and  $A_t$  are all disjoint. We have:

$$\begin{aligned}
& \sum_{i \in A} \delta_i(x_i) + \sum_{ij \in (A, S \setminus A)} \delta_{ij}^i(x_i, x_j) + \sum_{ij \in (A, V \setminus S)} \delta_{ij}^i(x_i, \cdot) + \sum_{ij \in (A, A)} \delta_{ij}^{ij}(x_i, x_j) \\
& \geq \sum_{i \in A} \delta_i(x_i) + \sum_{ij \in (A, S \setminus A)} \delta_{ij}^i(x_i, x_j) + \sum_{ij \in (A, V \setminus S)} \delta_{ij}^i(x_i, \cdot) \\
& \geq \sum_t \sum_{i \in A_t} \delta_i(x_i) + \sum_t \sum_{ij \in (A_t, S_t \setminus A_t)} \delta_{ij}^i(x_i, x_j) + \sum_t \sum_{ij \in (A_t, V \setminus S_t)} \delta_{ij}^i(x_i, \cdot) \\
& = \sum_t \left( \sum_{i \in A_t} \delta_i(x_i) + \sum_{ij \in (A_t, S_t \setminus A_t)} \delta_{ij}^i(x_i, x_j) + \sum_{ij \in (A_t, V \setminus S_t)} \delta_{ij}^i(x_i, \cdot) \right) \\
& > 0
\end{aligned} \tag{7}$$

where the last step is due to the  $|S_t|$ -condition for  $B := S_t$  and  $C := A_t \subseteq S_t$ . In the second inequality, it's easy to see  $\sum_{i \in A} \delta_i(x_i) = \sum_t \sum_{i \in A_t} \delta_i(x_i)$  since  $\{A_t\}$  is a disjoint partition of  $A$ , we just use the double summation to re-arrange  $\delta_i(x_i)$ 's.  $\sum_{ij \in (A, S \setminus A)} \delta_{ij}^i(x_i, x_j) \geq \sum_t \sum_{ij \in (A_t, S_t \setminus A_t)} \delta_{ij}^i(x_i, x_j)$  and  $\sum_{ij \in (A, V \setminus S)} \delta_{ij}^i(x_i, \cdot) \geq \sum_t \sum_{ij \in (A_t, V \setminus S_t)} \delta_{ij}^i(x_i, \cdot)$  are non-trivial and we will show next.

We want to show  $\sum_{ij \in (A, S \setminus A)} \delta_{ij}^i(x_i, x_j) \geq \sum_t \sum_{ij \in (A_t, S_t \setminus A_t)} \delta_{ij}^i(x_i, x_j)$ . Firstly, we have  $\sum_t \sum_{ij \in (A_t, S_t \setminus A_t)} \delta_{ij}^i(x_i, x_j) = \sum_{ij \in \bigcup_t (A_t, S_t \setminus A_t)} \delta_{ij}^i(x_i, x_j)$ , since  $A_t$  are all disjoint, hence edge set  $(A_t, S_t \setminus A_t)$  are all disjoint as well. Next, we can see  $\bigcup_t (A_t, S_t \setminus A_t) \subseteq (A, S \setminus A)$  since we have  $A_t \subseteq A, S_t \setminus A_t \subseteq S \setminus A$  by their definition, hence  $(A_t, S_t \setminus A_t) \subseteq (A, S \setminus A)$  for each  $t$ . Finally, we have  $\delta_{ij}^i(x_i, x_j) \geq 0$  for ILM labeling, so putting things together, we have the desired inequality.

We also want to show  $\sum_{ij \in (A, V \setminus S)} \delta_{ij}^i(x_i, \cdot) \geq \sum_t \sum_{ij \in (A_t, V \setminus S_t)} \delta_{ij}^i(x_i, \cdot)$ . Again, we have  $\sum_t \sum_{ij \in (A_t, V \setminus S_t)} \delta_{ij}^i(x_i, \cdot) = \sum_{ij \in \bigcup_t (A_t, V \setminus S_t)} \delta_{ij}^i(x_i, \cdot)$  since  $(A_t, V \setminus S_t)$  are all disjoint. Next, we can show  $\bigcup_t (A_t, V \setminus S_t) \supseteq (A, V \setminus S)$ . Since  $\forall (i, j) \in (A, V \setminus S)$ , we must be able to find one  $A_t$  such that  $i \in A_t$  since  $A = \bigcup_t A_t$ . Now it's easy to show  $(i, j) \in (A_t, V \setminus S_t)$  since  $V \setminus S \subseteq V \setminus S_t$ . Finally, we have  $\delta_{ij}^i(x_i, \cdot) \leq 0$  by its definition (given  $x_i$ , we can pick any  $y_i \neq x_i$  and let  $z_j \in \arg \min_z \theta_{ij}(y_i, z)$ ), so putting things together, we have the desired inequality.  $\square$

## 4. Proof of Theorem 7

**Theorem 7.**  $P_{DEE} \subseteq P_{PR}$  for binary MRFs.

*Proof.* Suppose not, assume  $x_i = \alpha$  is the first variable which is proved to be persistent by running DEE that is not in  $P_{PR}$ . Denote the minimum energy change for unary and pairwise costs as  $\delta_i(x_i), \delta_{ij}^i(x_i, x_j)$ , label set as  $\mathcal{L}_i$  at the time when we test if  $x_i$  is persistent. It satisfies  $\delta_i(x_i) + \sum_{(i,j) \in E} \delta_{ij}^i(x_i, \cdot) > 0$ . Next, considering running PR for one more iteration from its converging status to construct a constant persistent partial labeling using  $\alpha$ . Denote the minimum energy change for this iteration as  $\bar{\delta}_i(x_i), \bar{\delta}_{ij}^i(x_i, x_j), \bar{\delta}_{ij}^i(x_i, \cdot)$  and label set as  $\bar{\mathcal{L}}_i$ . It's easy to see  $\delta_i(x_i) = \bar{\delta}_i(x_i)$ , which also depends on  $x_i$ , since both of them are checking  $x_i = \alpha$ . We also have  $\bar{\delta}_{ij}^i(x_i, \cdot) \geq \delta_{ij}^i(x_i, \cdot)$  since before  $x_i$ , DEE only finds a subset of  $P_{PR}$  to be persistent, i.e.,  $\mathcal{L}_j \supseteq \bar{\mathcal{L}}_j, \forall j$  for the binary MRFs, which makes  $\bar{\delta}_{ij}^i(x_i, \cdot) = \min_{y_i \neq \alpha, y_j \in \bar{\mathcal{L}}_j} (\theta_{ij}(y_i, y_j) - \theta_{ij}(\alpha, y_j)) \geq \min_{y_i \neq \alpha, y_j \in \mathcal{L}_j} (\theta_{ij}(y_i, y_j) - \theta_{ij}(\alpha, y_j)) = \delta_{ij}^i(x_i, \cdot)$ . Therefore, we must have  $\bar{\delta}_i(x_i) + \sum_{(i,j) \in E} \bar{\delta}_{ij}^i(x_i, \cdot) > 0$ . So when we use the approximation of  $k$ -condition to test persistency,  $x_i$  will never be removed from  $S_\alpha$  since  $\{i\}$  satisfies the 1-condition, so it will never be shown in the unpartitioned variable set  $U$ . When we use  $k$ -condition to test persistency,  $x_i$  will also never be removed from  $S_\alpha$  during the shrinking procedure. Otherwise, suppose we find  $B \subseteq S_\alpha$  violating  $k$ -condition and we decided to remove  $x_i$ . Recall we choose the knocked out variable with the minimum  $\bar{\delta}_i(x_i) + \sum_{(i,j) \in E} \bar{\delta}_{ij}^i(x_i, \cdot)$  value, it means we have  $\bar{\delta}_i(x_i) + \sum_{(i,j) \in E} \bar{\delta}_{ij}^i(x_i, \cdot) > 0$  for all  $i \in B$ , which is a contradiction with  $B$  violates the  $k$ -condition. In sum, no matter what variable of PR algorithm we run, we will never remove  $x_i$  from  $S_\alpha$ . Therefore,  $x_i$  will be proved as persistent at the end of the new iteration, which is a contraction to PR has converged.  $\square$

**Remark 8.** *The nice thing about DEE for binary MRFs is ruling out one label is equivalent to nailing down one variable. That's the key fact for us to claim  $\mathcal{L}_j \supseteq \bar{\mathcal{L}}_j, \forall j$  in the proof above. For the multi-label MRFs, we cannot guarantee it. It is possible that DEE have ruled out some labeling from optimal labeling in  $\mathcal{L}_j$  but cannot prove  $x_j$  to be persistent since we still have  $|\mathcal{L}_j| > 1$ . However, in our experiment, we never observed that DEE can prove one variable to be persistent but PR cannot. In general, PR can find substantially more persistent variables than DEE.*

**Remark 9.** *Although in our hierarchical relaxation and decision problem,  $k$ -condition is always stronger than  $(k+1)$ -condition, we do not necessarily have  $P_{PR-k} \subseteq P_{PR-(k+1)}$ , due to it depends on how to choose the knocked out variable from a violated set  $B$ . However, our experiments do indicate PR- $(k+1)$  can usually find significantly more persistent variables than PR- $k$ .*

## 5. More experiments and analysis

### 5.1. Preprocessing multi-label MRF v.s. induced binary MRF

We showed the results on applying pre-processing to the multi-label MRF directly in Figure 1. It's conducted on color segmentation dataset (n4 version) which contains up to 12 labels. It's amazing that the mPR-based approach can achieve comparable result to KOVTUN (although still 10% less). Recalling it treats all the labels independently and purely rely on the local condition, which is much simpler than the flow-based condition KOVTUN used. mDEE is struggling in the multi-label setting, it finds very few partial optimal variables.

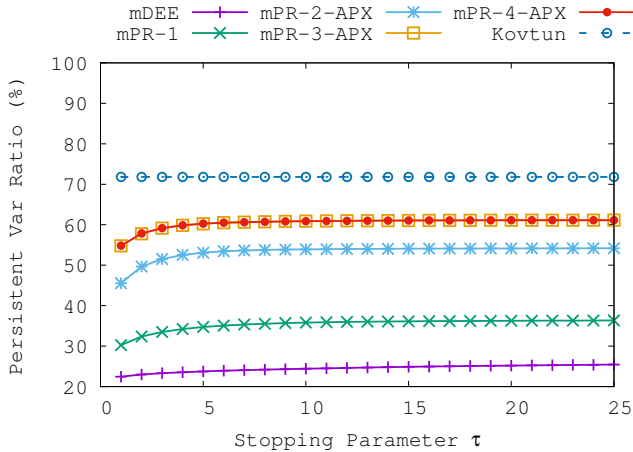

Figure 1. Preprocessing Multi-label MRFs

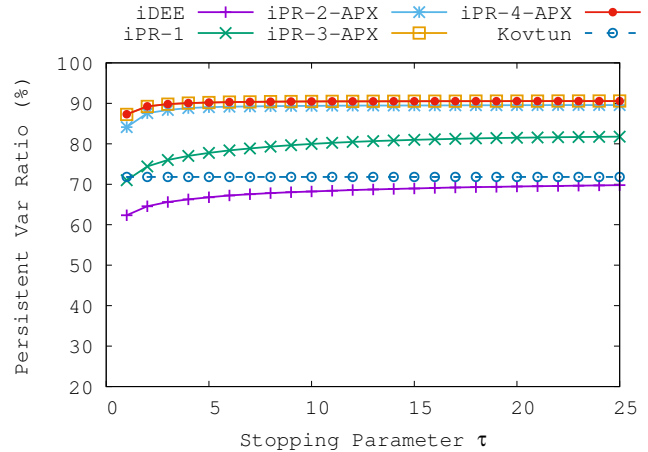

Figure 2. Preprocessing Induced Binary MRFs

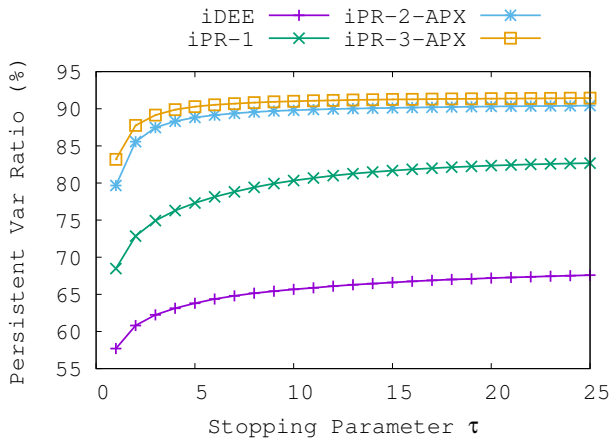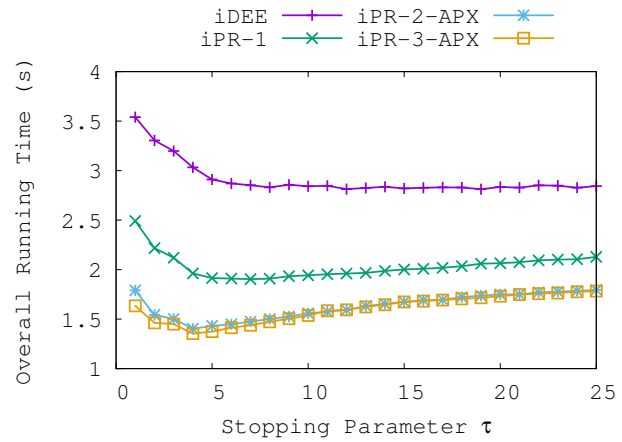

Figure 3. Persistent variables ratio vs. stopping parameter  $\tau$  on Color-Seg-N4 dataset.

Comparing the left and right figure in Figure 2, we will find the advantage of applying pre-processing technique to each induced binary MRF. Note that all the iPR-based approaches all easily beat KOVTUN in this case. It indicates that although it's hard to find some global partial optimal variables, the induced binary problem are much easier. Before our approach, iDEE is the only choice suits for this per iteration pre-processing in  $\alpha$ -expansion. Now, we provide a more general and powerful alternative.

## 5.2. More results for sensitivity analysis on $\tau$

Figure 3 and 4 show the more detailed analysis of different  $\tau$  values of iDEE, iPR-1, iPR-2-APX, iPR-3-APX running on the color segmentation datasets. The curves on all of the dataset look similar. Which confirms the conclusion in the main paper that the persistent var ratio converges very quickly with the growth of  $\tau$ . For all these four approaches listed here, they can find the persistent variables when  $\tau = 25$  no less than 1.5% compared to their converging values. In general, the overall running time decreases firstly and then increases due to it's a tradeoff between the speed and the quality of the preprocessing step. The proposed approach is not very sensitive to the choice of this stopping parameter, low total running time can be achieved in a very border range. PR-based approaches significantly outperforms DEE and other baseline methods no matter which  $\tau$  we choose.

## 5.3. Detailed experimental results

The followed up tables provide a more detailed per-instance results with preprocessing time, flow computation time, overall running time and persistent variables ratio. (We only report average number on scene decomposition dataset due to there are 715 instances.) We can see that PR-based approaches almost win on every instance. Note that we just pick  $\tau = 5$

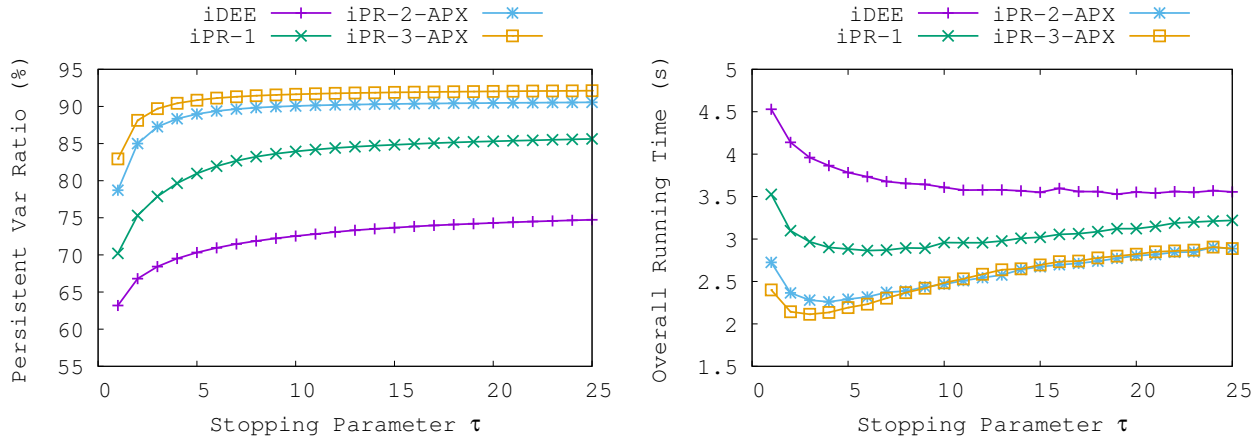

Figure 4. Persistent variables ratio vs. stopping parameter  $\tau$  on Color-Seg-N8 dataset.

as an example to report the results. We conducted experiments on a variety of choices from 1 to 25 and  $\infty$  (i.e., waiting until converge). For only very few instances, waiting until converge will spend a long time. But in general, they all achieve similar performance for  $k \geq 5$ . Just as we said in the sensitivity analysis section, the proposed methods are pretty robust to the choice of  $\tau$ .

Table 1: Brain-MRI Dataset for  $\tau = 5$

| Approach                        | Preprocessing Time (s) | Flow Time (s) | Overall Time (s) | Speedup      | Persistent Var Ratio (%) |
|---------------------------------|------------------------|---------------|------------------|--------------|--------------------------|
| Instance Brain-0-9mm (5 labels) |                        |               |                  |              |                          |
| $\alpha$ -EXP                   | 0.0005                 | 29.5179       | 30.1123          | 1.00         | 0.00                     |
| KOVTUN                          | 5.7239                 | 2.0030        | 8.2565           | 3.65         | 92.15                    |
| iDEE                            | 0.7012                 | 3.5980        | 4.8680           | 6.19         | 89.28                    |
| iPR-1                           | 1.1698                 | 1.0659        | 2.8513           | 10.56        | 97.65                    |
| iPR-2-APX                       | 1.3974                 | 0.6506        | <b>2.5919</b>    | <b>11.62</b> | 99.01                    |
| iPR-3-APX                       | 1.6068                 | 0.6801        | 2.9005           | 10.38        | 99.15                    |
| iPR-4-APX                       | 1.5891                 | <b>0.6089</b> | 2.7399           | 10.99        | <b>99.16</b>             |
| Instance Brain-1-9mm (5 labels) |                        |               |                  |              |                          |
| $\alpha$ -EXP                   | 0.0006                 | 28.9777       | 29.5599          | 1.00         | 0.00                     |
| KOVTUN                          | 5.5585                 | 2.5094        | 8.7403           | 3.38         | 92.11                    |
| iDEE                            | 0.5971                 | 3.3291        | 4.4639           | 6.62         | 89.05                    |
| iPR-1                           | 1.0582                 | 0.9848        | 2.6253           | 11.26        | 97.64                    |
| iPR-2-APX                       | 1.4479                 | 0.6336        | 2.6252           | 11.26        | 98.99                    |
| iPR-3-APX                       | 1.5777                 | 0.6223        | 2.7479           | 10.76        | 99.12                    |
| iPR-4-APX                       | 1.5129                 | <b>0.5853</b> | <b>2.6180</b>    | <b>11.29</b> | <b>99.13</b>             |
| Instance Brain-2-9mm (5 labels) |                        |               |                  |              |                          |
| $\alpha$ -EXP                   | 0.0006                 | 34.5505       | 35.2329          | 1.00         | 0.00                     |
| KOVTUN                          | 8.8595                 | 3.3385        | 13.0484          | 2.70         | 91.86                    |
| iDEE                            | 0.7438                 | 4.2960        | 5.7512           | 6.13         | 89.71                    |
| iPR-1                           | 1.2384                 | 1.1436        | 3.0590           | 11.52        | 97.77                    |
| iPR-2-APX                       | 1.5239                 | 0.7936        | <b>2.9844</b>    | <b>11.81</b> | 99.05                    |
| iPR-3-APX                       | 1.6548                 | 0.6915        | 2.9911           | 11.78        | 99.18                    |
| iPR-4-APX                       | 1.6875                 | <b>0.6852</b> | 2.9992           | 11.75        | <b>99.19</b>             |
| Instance Brain-3-9mm (5 labels) |                        |               |                  |              |                          |
| $\alpha$ -EXP                   | 0.0007                 | 7.4870        | 7.6523           | 1.00         | 0.00                     |
| KOVTUN                          | 5.3640                 | 0.1280        | 5.6350           | 1.36         | <b>100.00</b>            |
| iDEE                            | 0.0930                 | 0.1834        | 0.4386           | 17.45        | <b>100.00</b>            |

Continued on next page

Table 1 – continued from previous page

| Approach                        | Preprocessing Time (s) | Flow Time (s) | Overall Time (s) | Speedup      | Persistent Var Ratio (%) |
|---------------------------------|------------------------|---------------|------------------|--------------|--------------------------|
| iPR-1                           | 0.1432                 | 0.1287        | <b>0.4196</b>    | <b>18.24</b> | <b>100.00</b>            |
| iPR-2-APX                       | 0.2118                 | 0.1383        | 0.5037           | 15.19        | <b>100.00</b>            |
| iPR-3-APX                       | 0.2250                 | <b>0.1276</b> | 0.4943           | 15.48        | <b>100.00</b>            |
| iPR-4-APX                       | 0.2254                 | 0.1309        | 0.4998           | 15.31        | <b>100.00</b>            |
| Instance Brain-0-5mm (5 labels) |                        |               |                  |              |                          |
| $\alpha$ -EXP                   | 0.0009                 | 88.9107       | 90.7756          | 1.00         | 0.00                     |
| KOVTUN                          | 12.6237                | 6.1703        | 20.6173          | 4.40         | 93.35                    |
| iDEE                            | 2.3417                 | 12.2558       | 16.5301          | 5.49         | 88.98                    |
| iPR-1                           | 3.0442                 | 3.0347        | 7.8581           | 11.55        | 97.79                    |
| iPR-2-APX                       | 3.8545                 | 2.0903        | <b>7.5635</b>    | <b>12.00</b> | 99.04                    |
| iPR-3-APX                       | 4.3486                 | <b>2.0382</b> | 8.1504           | 11.14        | 99.17                    |
| iPR-4-APX                       | 4.9834                 | 2.1079        | 8.8157           | 10.30        | <b>99.18</b>             |
| Instance Brain-1-5mm (5 labels) |                        |               |                  |              |                          |
| $\alpha$ -EXP                   | 0.0029                 | 91.4609       | 93.3824          | 1.00         | 0.00                     |
| KOVTUN                          | 13.0218                | 5.4269        | 20.1310          | 4.64         | 93.39                    |
| iDEE                            | 1.9013                 | 10.7959       | 14.3866          | 6.49         | 88.92                    |
| iPR-1                           | 3.3861                 | 3.2456        | 8.3935           | 11.13        | 97.80                    |
| iPR-2-APX                       | 4.5024                 | 2.6153        | 9.2742           | 10.07        | 99.04                    |
| iPR-3-APX                       | 4.5294                 | <b>2.0818</b> | <b>8.2837</b>    | <b>11.27</b> | 99.17                    |
| iPR-4-APX                       | 4.6707                 | 2.1165        | 8.5005           | 10.99        | <b>99.18</b>             |
| Instance Brain-2-5mm (5 labels) |                        |               |                  |              |                          |
| $\alpha$ -EXP                   | 0.0012                 | 93.4645       | 95.3155          | 1.00         | 0.00                     |
| KOVTUN                          | 12.7966                | 4.7755        | 19.0363          | 5.01         | 93.52                    |
| iDEE                            | 1.9529                 | 10.5398       | 14.2952          | 6.67         | 89.12                    |
| iPR-1                           | 3.1350                 | 3.0258        | <b>7.7878</b>    | <b>12.24</b> | 97.73                    |
| iPR-2-APX                       | 4.4257                 | 2.3652        | 8.7054           | 10.95        | 99.03                    |
| iPR-3-APX                       | 4.5862                 | 2.1204        | 8.5141           | 11.20        | 99.17                    |
| iPR-4-APX                       | 4.4486                 | <b>1.9875</b> | 8.1466           | 11.70        | <b>99.19</b>             |
| Instance Brain-3-5mm (5 labels) |                        |               |                  |              |                          |
| $\alpha$ -EXP                   | 0.0013                 | 95.7588       | 97.6432          | 1.00         | 0.00                     |
| KOVTUN                          | 12.6239                | 5.3238        | 19.5473          | 5.00         | 93.16                    |
| iDEE                            | 2.1083                 | 12.1846       | 16.4071          | 5.95         | 88.73                    |
| iPR-1                           | 3.1185                 | 2.9804        | 7.7995           | 12.52        | 97.85                    |
| iPR-2-APX                       | 3.9139                 | 2.0976        | 7.7210           | 12.65        | 99.08                    |
| iPR-3-APX                       | 4.9082                 | 2.2410        | 9.0263           | 10.82        | 99.20                    |
| iPR-4-APX                       | 4.1823                 | <b>1.8582</b> | <b>7.6376</b>    | <b>12.78</b> | <b>99.21</b>             |

Table 2: Color Segmentation Dataset (N4 Version) for  $\tau = 5$ 

| Approach                       | Preprocessing Time (s) | Flow Time (s) | Overall Time (s) | Speedup      | Persistent Var Ratio (%) |
|--------------------------------|------------------------|---------------|------------------|--------------|--------------------------|
| Instance clownfish (12 labels) |                        |               |                  |              |                          |
| $\alpha$ -EXP                  | 0.0001                 | 11.0117       | 11.2568          | 1.00         | 0.00                     |
| KOVTUN                         | 0.7680                 | 2.0686        | 3.0606           | 3.68         | 73.77                    |
| iDEE                           | 0.1386                 | 1.2712        | 1.6311           | 6.90         | 86.38                    |
| iPR-1                          | 0.2445                 | 0.4459        | 0.9135           | 12.32        | 95.49                    |
| iPR-2-APX                      | 0.3068                 | 0.2574        | <b>0.7887</b>    | <b>14.27</b> | 98.15                    |
| iPR-3-APX                      | 0.3497                 | 0.2458        | 0.8158           | 13.80        | 98.30                    |
| iPR-4-APX                      | 0.3528                 | <b>0.2411</b> | 0.8063           | 13.96        | <b>98.31</b>             |
| Instance crops (12 labels)     |                        |               |                  |              |                          |

Continued on next page

Table 2 – continued from previous page

| Approach                       | Preprocessing Time (s) | Flow Time (s) | Overall Time (s) | Speedup      | Persistent Var Ratio (%) |
|--------------------------------|------------------------|---------------|------------------|--------------|--------------------------|
| $\alpha$ -EXP                  | 0.0001                 | 14.0721       | 14.4047          | 1.00         | 0.00                     |
| KOVTUN                         | 0.7777                 | 4.7165        | 5.8195           | 2.48         | 64.44                    |
| iDEE                           | 0.1684                 | 2.3073        | 2.7720           | 5.20         | 82.52                    |
| iPR-1                          | 0.3215                 | 0.8315        | 1.4374           | 10.02        | 93.73                    |
| iPR-2-APX                      | 0.3803                 | 0.3885        | <b>1.0617</b>    | <b>13.57</b> | 97.62                    |
| iPR-3-APX                      | 0.4347                 | <b>0.3488</b> | 1.0742           | 13.41        | 97.91                    |
| iPR-4-APX                      | 0.4409                 | 0.3494        | 1.0861           | 13.26        | <b>97.92</b>             |
| Instance fourcolors (4 labels) |                        |               |                  |              |                          |
| $\alpha$ -EXP                  | 0.0001                 | 1.7075        | 1.7472           | 1.00         | 0.00                     |
| KOVTUN                         | 0.2423                 | <b>0.4117</b> | 0.6915           | 2.53         | 69.16                    |
| iDEE                           | 0.0155                 | 1.5649        | 1.6145           | 1.08         | 0.23                     |
| iPR-1                          | 0.1046                 | 1.2016        | 1.3422           | 1.30         | 24.17                    |
| iPR-2-APX                      | 0.1426                 | 0.4985        | 0.6756           | 2.59         | 73.28                    |
| iPR-3-APX                      | 0.1716                 | 0.4621        | 0.6665           | 2.62         | 76.24                    |
| iPR-4-APX                      | 0.1761                 | 0.4511        | <b>0.6605</b>    | <b>2.65</b>  | <b>76.42</b>             |
| Instance lake (12 labels)      |                        |               |                  |              |                          |
| $\alpha$ -EXP                  | 0.0001                 | 9.1911        | 9.3905           | 1.00         | 0.00                     |
| KOVTUN                         | 0.7707                 | 2.0279        | 3.0037           | 3.13         | 74.41                    |
| iDEE                           | 0.1104                 | 0.9078        | 1.2074           | 7.78         | 88.95                    |
| iPR-1                          | 0.2127                 | 0.4008        | 0.8039           | 11.68        | 95.37                    |
| iPR-2-APX                      | 0.2769                 | 0.2257        | <b>0.6974</b>    | <b>13.47</b> | 98.02                    |
| iPR-3-APX                      | 0.3198                 | <b>0.2112</b> | 0.7234           | 12.98        | 98.19                    |
| iPR-4-APX                      | 0.3226                 | 0.2123        | 0.7234           | 12.98        | <b>98.20</b>             |
| Instance palm (12 labels)      |                        |               |                  |              |                          |
| $\alpha$ -EXP                  | 0.0001                 | 11.6085       | 11.8688          | 1.00         | 0.00                     |
| KOVTUN                         | 0.7842                 | 3.4438        | 4.4894           | 2.64         | 68.44                    |
| iDEE                           | 0.1527                 | 4.8633        | 5.2478           | 2.26         | 54.86                    |
| iPR-1                          | 0.3215                 | 2.7908        | 3.3506           | 3.54         | 74.29                    |
| iPR-2-APX                      | 0.4940                 | 1.5906        | 2.3290           | 5.10         | 85.71                    |
| iPR-3-APX                      | 0.5313                 | <b>1.3276</b> | <b>2.0944</b>    | <b>5.67</b>  | 88.16                    |
| iPR-4-APX                      | 0.5546                 | 1.3395        | 2.1239           | 5.59         | <b>88.19</b>             |
| Instance penguin (8 labels)    |                        |               |                  |              |                          |
| $\alpha$ -EXP                  | 0.0001                 | 4.7494        | 4.8516           | 1.00         | 0.00                     |
| KOVTUN                         | 0.4280                 | <b>0.3012</b> | 0.8263           | 5.87         | <b>91.71</b>             |
| iDEE                           | 0.0501                 | 1.0353        | 1.1810           | 4.11         | 75.61                    |
| iPR-1                          | 0.1004                 | 0.7650        | 0.9635           | 5.04         | 82.37                    |
| iPR-2-APX                      | 0.1864                 | 0.5120        | 0.7919           | 6.13         | 88.07                    |
| iPR-3-APX                      | 0.1919                 | 0.4410        | 0.7326           | 6.62         | 90.36                    |
| iPR-4-APX                      | 0.1926                 | 0.4329        | <b>0.7213</b>    | <b>6.73</b>  | 90.36                    |
| Instance pfau (12 labels)      |                        |               |                  |              |                          |
| $\alpha$ -EXP                  | 0.0001                 | 12.4477       | 12.7087          | 1.00         | 0.00                     |
| KOVTUN                         | 0.6869                 | 13.1554       | 14.1369          | 0.90         | 5.55                     |
| iDEE                           | 0.1860                 | 6.8432        | 7.2792           | 1.75         | 43.33                    |
| iPR-1                          | 0.4169                 | 4.4423        | 5.1083           | 2.49         | 63.63                    |
| iPR-2-APX                      | 0.6941                 | 3.1020        | 4.0396           | 3.15         | 75.86                    |
| iPR-3-APX                      | 0.8554                 | 2.8141        | <b>3.9155</b>    | <b>3.25</b>  | 78.26                    |
| iPR-4-APX                      | 0.8814                 | <b>2.8139</b> | 3.9503           | 3.22         | <b>78.29</b>             |
| Instance snail (3 labels)      |                        |               |                  |              |                          |
| $\alpha$ -EXP                  | 0.0001                 | 1.1219        | 1.1490           | 1.00         | 0.00                     |
| KOVTUN                         | 0.1589                 | <b>0.0330</b> | 0.2202           | 5.22         | <b>97.55</b>             |

Continued on next page

Table 2 – continued from previous page

| Approach                        | Preprocessing Time (s) | Flow Time (s) | Overall Time (s) | Speedup     | Persistent Var Ratio (%) |
|---------------------------------|------------------------|---------------|------------------|-------------|--------------------------|
| iDEE                            | 0.0211                 | 0.1637        | 0.2179           | 5.27        | 83.11                    |
| iPR-1                           | 0.0381                 | 0.0983        | 0.1632           | 7.04        | 89.24                    |
| iPR-2-APX                       | 0.0484                 | 0.0431        | <b>0.1180</b>    | <b>9.74</b> | 96.24                    |
| iPR-3-APX                       | 0.0557                 | 0.0400        | 0.1217           | 9.44        | 96.74                    |
| iPR-4-APX                       | 0.0563                 | 0.0394        | 0.1220           | 9.42        | 96.73                    |
| Instance strawberry (12 labels) |                        |               |                  |             |                          |
| $\alpha$ -EXP                   | 0.0001                 | 11.7457       | 12.0142          | 1.00        | 0.00                     |
| KOVTUN                          | 0.6986                 | 5.3305        | 6.2930           | 1.91        | 54.64                    |
| iDEE                            | 0.1395                 | 4.6473        | 5.0390           | 2.38        | 59.32                    |
| iPR-1                           | 0.3003                 | 2.5991        | 3.1464           | 3.82        | 77.54                    |
| iPR-2-APX                       | 0.5163                 | 1.6148        | 2.3899           | 5.03        | 86.39                    |
| iPR-3-APX                       | 0.5810                 | <b>1.3912</b> | <b>2.2202</b>    | <b>5.41</b> | 88.32                    |
| iPR-4-APX                       | 0.5908                 | 1.4092        | 2.2461           | 5.35        | <b>88.41</b>             |

Table 3: Color Segmentation Dataset (N8 Version) for  $\tau = 5$ 

| Approach                       | Preprocessing Time (s) | Flow Time (s) | Overall Time (s) | Speedup      | Persistent Var Ratio (%) |
|--------------------------------|------------------------|---------------|------------------|--------------|--------------------------|
| Instance clownfish (12 labels) |                        |               |                  |              |                          |
| $\alpha$ -EXP                  | 0.0001                 | 15.7031       | 16.0336          | 1.00         | 0.00                     |
| KOVTUN                         | 1.3051                 | 2.7580        | 4.3214           | 3.71         | 73.28                    |
| iDEE                           | 0.1992                 | 1.0167        | 1.5301           | 10.48        | 93.15                    |
| iPR-1                          | 0.3505                 | 0.5900        | 1.2578           | 12.75        | 96.55                    |
| iPR-2-APX                      | 0.4731                 | 0.3858        | <b>1.1771</b>    | <b>13.62</b> | 98.26                    |
| iPR-3-APX                      | 0.5272                 | <b>0.3480</b> | 1.1971           | 13.39        | 98.59                    |
| iPR-4-APX                      | 0.5286                 | 0.3489        | 1.1935           | 13.43        | <b>98.62</b>             |
| Instance crops (12 labels)     |                        |               |                  |              |                          |
| $\alpha$ -EXP                  | 0.0001                 | 20.0284       | 20.4477          | 1.00         | 0.00                     |
| KOVTUN                         | 1.3156                 | 6.8882        | 8.6202           | 2.37         | 64.40                    |
| iDEE                           | 0.2449                 | 2.2717        | 2.9275           | 6.98         | 89.16                    |
| iPR-1                          | 0.4669                 | 1.0430        | 1.9139           | 10.68        | 95.31                    |
| iPR-2-APX                      | 0.5811                 | 0.5690        | <b>1.5582</b>    | <b>13.12</b> | 97.80                    |
| iPR-3-APX                      | 0.6512                 | 0.5196        | 1.5801           | 12.94        | 98.16                    |
| iPR-4-APX                      | 0.6644                 | <b>0.4984</b> | 1.5657           | 13.06        | <b>98.23</b>             |
| Instance fourcolors (4 labels) |                        |               |                  |              |                          |
| $\alpha$ -EXP                  | 0.0001                 | 2.6387        | 2.6982           | 1.00         | 0.00                     |
| KOVTUN                         | 0.4013                 | <b>0.7271</b> | 1.1909           | 2.27         | 67.48                    |
| iDEE                           | 0.0464                 | 2.5394        | 2.6462           | 1.02         | 3.26                     |
| iPR-1                          | 0.2163                 | 1.5642        | 1.8404           | 1.47         | 43.08                    |
| iPR-2-APX                      | 0.2779                 | 0.8137        | 1.1507           | 2.34         | 73.61                    |
| iPR-3-APX                      | 0.3351                 | 0.7340        | <b>1.1294</b>    | <b>2.39</b>  | 77.14                    |
| iPR-4-APX                      | 0.3563                 | 0.7275        | 1.1436           | 2.36         | <b>77.77</b>             |
| Instance lake (12 labels)      |                        |               |                  |              |                          |
| $\alpha$ -EXP                  | 0.0001                 | 13.4400       | 13.7211          | 1.00         | 0.00                     |
| KOVTUN                         | 1.3099                 | 3.1433        | 4.7301           | 2.90         | 73.86                    |
| iDEE                           | 0.1689                 | 0.9119        | 1.3642           | 10.06        | 93.05                    |
| iPR-1                          | 0.3076                 | 0.5178        | 1.0967           | 12.51        | 96.45                    |
| iPR-2-APX                      | 0.4256                 | 0.3429        | <b>1.0407</b>    | <b>13.18</b> | 98.20                    |
| iPR-3-APX                      | 0.4847                 | 0.3144        | 1.0663           | 12.87        | 98.46                    |
| iPR-4-APX                      | 0.4928                 | <b>0.2992</b> | 1.0628           | 12.91        | <b>98.54</b>             |

Continued on next page



Table 3 – continued from previous page

| Approach                        | Preprocessing Time (s) | Flow Time (s) | Overall Time (s) | Speedup     | Persistent Var Ratio (%) |
|---------------------------------|------------------------|---------------|------------------|-------------|--------------------------|
| Instance palm (12 labels)       |                        |               |                  |             |                          |
| $\alpha$ -EXP                   | 0.0001                 | 17.1379       | 17.4925          | 1.00        | 0.00                     |
| KOVTUN                          | 1.3670                 | 5.4137        | 7.1379           | 2.45        | 67.95                    |
| iDEE                            | 0.2456                 | 5.7760        | 6.3707           | 2.75        | 66.62                    |
| iPR-1                           | 0.5631                 | 4.2506        | 5.1738           | 3.38        | 75.80                    |
| iPR-2-APX                       | 0.7890                 | 2.8098        | 3.9386           | 4.44        | 84.61                    |
| iPR-3-APX                       | 0.8457                 | 2.1140        | 3.3120           | 5.28        | 88.76                    |
| iPR-4-APX                       | 0.8739                 | <b>2.0500</b> | <b>3.2671</b>    | <b>5.35</b> | <b>88.96</b>             |
| Instance penguin (8 labels)     |                        |               |                  |             |                          |
| $\alpha$ -EXP                   | 0.0001                 | 7.3409        | 7.4918           | 1.00        | 0.00                     |
| KOVTUN                          | 0.7543                 | <b>0.4608</b> | 1.3577           | 5.52        | <b>91.76</b>             |
| iDEE                            | 0.0839                 | 1.4313        | 1.6677           | 4.49        | 80.11                    |
| iPR-1                           | 0.1854                 | 1.2173        | 1.5574           | 4.81        | 83.52                    |
| iPR-2-APX                       | 0.3123                 | 0.9932        | 1.4572           | 5.14        | 86.87                    |
| iPR-3-APX                       | 0.3105                 | 0.6887        | 1.1465           | 6.53        | 90.95                    |
| iPR-4-APX                       | 0.3239                 | 0.6726        | <b>1.1451</b>    | <b>6.54</b> | 91.07                    |
| Instance pfau (12 labels)       |                        |               |                  |             |                          |
| $\alpha$ -EXP                   | 0.0001                 | 20.1059       | 20.5130          | 1.00        | 0.00                     |
| KOVTUN                          | 1.1149                 | 16.2915       | 17.7468          | 1.16        | 5.64                     |
| iDEE                            | 0.3387                 | 9.5948        | 10.3246          | 1.99        | 53.47                    |
| iPR-1                           | 0.7873                 | 7.0523        | 8.2420           | 2.49        | 66.57                    |
| iPR-2-APX                       | 1.2240                 | 4.9666        | <b>6.5963</b>    | <b>3.11</b> | 77.38                    |
| iPR-3-APX                       | 1.6829                 | 4.6373        | 6.7180           | 3.05        | 78.93                    |
| iPR-4-APX                       | 1.7893                 | <b>4.5348</b> | 6.7227           | 3.05        | <b>79.21</b>             |
| Instance snail (3 labels)       |                        |               |                  |             |                          |
| $\alpha$ -EXP                   | 0.0001                 | 1.9664        | 2.0148           | 1.00        | 0.00                     |
| KOVTUN                          | 0.2941                 | <b>0.0445</b> | 0.3721           | 5.41        | <b>97.45</b>             |
| iDEE                            | 0.0324                 | 0.1875        | 0.2682           | 7.51        | 89.02                    |
| iPR-1                           | 0.0661                 | 0.1455        | 0.2615           | 7.70        | 91.79                    |
| iPR-2-APX                       | 0.0892                 | 0.0817        | 0.2217           | 9.09        | 96.44                    |
| iPR-3-APX                       | 0.0931                 | 0.0666        | <b>0.2074</b>    | <b>9.71</b> | 97.26                    |
| iPR-4-APX                       | 0.0950                 | 0.0656        | 0.2083           | 9.67        | 97.36                    |
| Instance strawberry (12 labels) |                        |               |                  |             |                          |
| $\alpha$ -EXP                   | 0.0001                 | 17.4269       | 17.7993          | 1.00        | 0.00                     |
| KOVTUN                          | 1.1757                 | 8.0612        | 9.6044           | 1.85        | 53.82                    |
| iDEE                            | 0.2346                 | 6.3368        | 6.9496           | 2.56        | 65.13                    |
| iPR-1                           | 0.4871                 | 3.7356        | 4.5943           | 3.87        | 79.66                    |
| iPR-2-APX                       | 0.7770                 | 2.3417        | 3.4844           | 5.11        | 87.67                    |
| iPR-3-APX                       | 0.9608                 | <b>2.0517</b> | <b>3.3714</b>    | <b>5.28</b> | 89.32                    |
| iPR-4-APX                       | 0.9965                 | 2.0572        | 3.4192           | 5.21        | <b>89.59</b>             |

Table 4: Inpainting Dataset (N8 Version) for  $\tau = 5$ 

| Approach                                            | Preprocessing Time (s) | Flow Time (s) | Overall Time (s) | Speedup | Persistent Var Ratio (%) |
|-----------------------------------------------------|------------------------|---------------|------------------|---------|--------------------------|
| Instance triplepoint4-plain-ring-inverse (4 labels) |                        |               |                  |         |                          |
| $\alpha$ -EXP                                       | 0.0000                 | 0.4400        | 0.4469           | 1.00    | 0.00                     |
| KOVTUN                                              | 0.1287                 | <b>0.1628</b> | 0.2959           | 1.51    | 37.39                    |
| iDEE                                                | 0.0025                 | 0.2701        | 0.2814           | 1.59    | 40.89                    |
| iPR-1                                               | 0.0059                 | 0.2640        | 0.2765           | 1.62    | 43.99                    |

Continued on next page

Table 4 – continued from previous page

| Approach                                    | Preprocessing Time (s) | Flow Time (s) | Overall Time (s) | Speedup     | Persistent Var Ratio (%) |
|---------------------------------------------|------------------------|---------------|------------------|-------------|--------------------------|
| iPR-2-APX                                   | 0.0113                 | 0.2231        | 0.2424           | 1.84        | <b>56.02</b>             |
| iPR-3-APX                                   | 0.0167                 | 0.2159        | <b>0.2407</b>    | <b>1.86</b> | <b>56.02</b>             |
| iPR-4-APX                                   | 0.0144                 | 0.2204        | 0.2448           | 1.83        | <b>56.02</b>             |
| Instance triplepoint4-plain-ring (4 labels) |                        |               |                  |             |                          |
| $\alpha$ -EXP                               | 0.0000                 | 0.3949        | 0.4018           | 1.00        | 0.00                     |
| KOVTUN                                      | 0.1606                 | <b>0.0330</b> | 0.1984           | 2.03        | <b>87.38</b>             |
| iDEE                                        | 0.0040                 | 0.2393        | 0.2510           | 1.60        | 40.00                    |
| iPR-1                                       | 0.0061                 | 0.2188        | 0.2335           | 1.72        | 47.46                    |
| iPR-2-APX                                   | 0.0151                 | 0.1422        | 0.1648           | 2.44        | 67.47                    |
| iPR-3-APX                                   | 0.0133                 | 0.1423        | <b>0.1639</b>    | <b>2.45</b> | 67.47                    |
| iPR-4-APX                                   | 0.0138                 | 0.1476        | 0.1682           | 2.39        | 67.47                    |

Table 5: Middlebury Dataset for  $\tau = 5$ 

| Approach                   | Preprocessing Time (s) | Flow Time (s)   | Overall Time (s) | Speedup     | Persistent Var Ratio (%) |
|----------------------------|------------------------|-----------------|------------------|-------------|--------------------------|
| Instance Ted (60 labels)   |                        |                 |                  |             |                          |
| $\alpha$ -EXP              | 0.0001                 | 401.6440        | 407.3978         | 1.00        | 0.00                     |
| KOVTUN                     | N/A                    | N/A             | N/A              | N/A         | N/A                      |
| iDEE                       | 2.7050                 | 238.0053        | 244.7326         | 1.66        | 18.31                    |
| iPR-1                      | 11.1137                | 178.5905        | 193.5722         | 2.10        | 40.96                    |
| iPR-2-APX                  | 14.6403                | 125.7790        | 144.2356         | 2.82        | 60.24                    |
| iPR-3-APX                  | 17.6393                | 121.4567        | <b>142.8571</b>  | <b>2.85</b> | 61.47                    |
| iPR-4-APX                  | 17.8660                | <b>121.4136</b> | 143.0377         | 2.85        | <b>61.51</b>             |
| Instance Tsu (16 labels)   |                        |                 |                  |             |                          |
| $\alpha$ -EXP              | 0.0001                 | 43.4328         | 43.8352          | 1.00        | 0.00                     |
| KOVTUN                     | N/A                    | N/A             | N/A              | N/A         | N/A                      |
| iDEE                       | 0.3030                 | 30.8764         | 31.4713          | 1.39        | 7.36                     |
| iPR-1                      | 1.1738                 | 28.7990         | 30.2676          | 1.45        | 14.31                    |
| iPR-2-APX                  | 2.0666                 | 25.8126         | <b>28.1741</b>   | <b>1.56</b> | 24.74                    |
| iPR-3-APX                  | 2.6680                 | 25.4327         | 28.3969          | 1.54        | <b>25.81</b>             |
| iPR-4-APX                  | 2.6253                 | <b>25.3058</b>  | 28.2289          | 1.55        | <b>25.81</b>             |
| Instance Ven (20 labels)   |                        |                 |                  |             |                          |
| $\alpha$ -EXP              | 0.0002                 | 125.0321        | 126.2441         | 1.00        | 0.00                     |
| KOVTUN                     | N/A                    | N/A             | N/A              | N/A         | N/A                      |
| iDEE                       | 0.7714                 | 85.6125         | <b>87.2133</b>   | <b>1.45</b> | 2.43                     |
| iPR-1                      | 2.7314                 | 85.0040         | 88.5553          | 1.43        | 2.98                     |
| iPR-2-APX                  | 5.3439                 | 83.8337         | 90.0001          | 1.40        | 4.23                     |
| iPR-3-APX                  | 7.3890                 | <b>83.6677</b>  | 91.8756          | 1.37        | <b>4.46</b>              |
| iPR-4-APX                  | 7.6478                 | 83.7015         | 92.1813          | 1.37        | <b>4.46</b>              |
| Instance Family (5 labels) |                        |                 |                  |             |                          |
| $\alpha$ -EXP              | 0.0004                 | 97.8842         | 98.6301          | 1.00        | 0.00                     |
| KOVTUN                     | N/A                    | N/A             | N/A              | N/A         | N/A                      |
| iDEE                       | 0.4242                 | 95.6904         | 96.7831          | 1.02        | 4.27                     |
| iPR-1                      | 1.3475                 | 96.6937         | 98.7191          | 1.00        | 4.34                     |
| iPR-2-APX                  | 2.1232                 | 94.8641         | 97.6514          | 1.01        | 4.61                     |
| iPR-3-APX                  | 2.2898                 | 93.2351         | 96.1786          | 1.03        | <b>4.63</b>              |
| iPR-4-APX                  | 2.2855                 | <b>89.4289</b>  | <b>92.3023</b>   | <b>1.07</b> | <b>4.63</b>              |
| Instance Pano (7 labels)   |                        |                 |                  |             |                          |
| $\alpha$ -EXP              | 0.0004                 | 106.8310        | 108.2290         | 1.00        | 0.00                     |

Continued on next page

Table 5 – continued from previous page

| Approach                      | Preprocessing Time (s) | Flow Time (s)   | Overall Time (s) | Speedup     | Persistent Var Ratio (%) |
|-------------------------------|------------------------|-----------------|------------------|-------------|--------------------------|
| KOVTUN                        | N/A                    | N/A             | N/A              | N/A         | N/A                      |
| iDEE                          | 0.1902                 | 107.1636        | 108.7092         | 1.00        | 0.00                     |
| iPR-1                         | 0.9723                 | 105.7037        | 108.1483         | 1.00        | 0.00                     |
| iPR-2-APX                     | 2.6996                 | 67.4241         | 71.5048          | 1.51        | 64.63                    |
| iPR-3-APX                     | 2.2728                 | 55.2445         | 58.7441          | 1.84        | <b>67.10</b>             |
| iPR-4-APX                     | 2.2762                 | <b>53.0225</b>  | <b>56.4861</b>   | <b>1.92</b> | <b>67.10</b>             |
| Instance House (256 labels)   |                        |                 |                  |             |                          |
| $\alpha$ -EXP                 | 0.0001                 | 921.9603        | 934.8721         | 1.00        | 0.00                     |
| KOVTUN                        | N/A                    | N/A             | N/A              | N/A         | N/A                      |
| iDEE                          | 4.9624                 | 807.0047        | 823.6554         | 1.14        | 5.29                     |
| iPR-1                         | 14.7405                | 672.4787        | 697.0348         | 1.34        | 5.71                     |
| iPR-2-APX                     | 24.2710                | 638.4153        | 672.0552         | 1.39        | 7.23                     |
| iPR-3-APX                     | 29.9763                | 638.7680        | 678.0096         | 1.38        | 7.57                     |
| iPR-4-APX                     | 30.3008                | <b>631.6456</b> | <b>671.1801</b>  | <b>1.39</b> | <b>7.74</b>              |
| Instance Penguin (256 labels) |                        |                 |                  |             |                          |
| $\alpha$ -EXP                 | 0.0000                 | 262.8118        | 267.1431         | 1.00        | 0.00                     |
| KOVTUN                        | N/A                    | N/A             | N/A              | N/A         | N/A                      |
| iDEE                          | 1.3234                 | 139.3348        | 143.6865         | 1.86        | 32.79                    |
| iPR-1                         | 5.1941                 | 120.3164        | 128.6085         | 2.08        | 42.92                    |
| iPR-2-APX                     | 7.4991                 | 98.4549         | 109.0183         | 2.45        | 53.85                    |
| iPR-3-APX                     | 8.9226                 | 96.6814         | 108.6613         | 2.46        | 54.70                    |
| iPR-4-APX                     | 9.1422                 | <b>96.4438</b>  | <b>108.6417</b>  | <b>2.46</b> | <b>54.72</b>             |

Table 6: Scene Decomposition Dataset for  $\tau = 5$ 

| Approach                                  | Preprocessing Time (s) | Flow Time (s) | Overall Time (s) | Speedup      | Persistent Var Ratio (%) |
|-------------------------------------------|------------------------|---------------|------------------|--------------|--------------------------|
| Average over all 715 instances (8 labels) |                        |               |                  |              |                          |
| $\alpha$ -EXP                             | 0.0000                 | 0.0111        | 0.0113           | 1.00         | 0.00                     |
| KOVTUN                                    | 0.0061                 | 0.0040        | 0.0103           | 1.10         | 61.66                    |
| iDEE                                      | 0.0002                 | 0.0007        | 0.0011           | 10.27        | 95.08                    |
| iPR-1                                     | 0.0004                 | 0.0005        | 0.0011           | 10.27        | 96.87                    |
| iPR-2-APX                                 | 0.0005                 | <b>0.0003</b> | <b>0.0010</b>    | <b>11.30</b> | 98.55                    |
| iPR-3-APX                                 | 0.0005                 | <b>0.0003</b> | <b>0.0010</b>    | <b>11.30</b> | 98.78                    |
| iPR-4-APX                                 | 0.0005                 | <b>0.0003</b> | <b>0.0010</b>    | <b>11.30</b> | <b>98.82</b>             |
